# Supplementary material for: Effect of Parity, Body Condition Score at Calving, and Milk Yield on the Metabolic Profile of Gyr Cows in the Transition Period
Source: MDPI journal article supplement (doi:10.3390/ani13152509), 2023-08-03
Supplement: s1 [file s1]

Supplementary Table S2. Variation (mean  $\pm$  SD) of serum concentrations of total proteins (TP) and albumin, and serum aspartate aminotransferase (AST) and gamma-glutamyltransferase (GGT) activities in high-producing Gyr cows grouped according to parity, on different days relative to calving (0 d), throughout the transition period.

| Variable      | Group | -21 d                           | -7 d                            | 0 d                              | 7 d                              | 21 d                             | 42 d                             |
|---------------|-------|---------------------------------|---------------------------------|----------------------------------|----------------------------------|----------------------------------|----------------------------------|
| TP (g/L)      | P     | 72.00 $\pm$ 2.00 <sup>Cb</sup>  | 71.46 $\pm$ 4.85 <sup>Bb</sup>  | 71.34 $\pm$ 7.12 <sup>Bb</sup>   | 75.53 $\pm$ 5.94 <sup>Ba</sup>   | 78.26 $\pm$ 6.17 <sup>Ba</sup>   | 76.80 $\pm$ 5.72 <sup>Ba</sup>   |
|               | B     | 77.70 $\pm$ 5.19 <sup>Bc</sup>  | 76.40 $\pm$ 6.32 <sup>Ac</sup>  | 77.30 $\pm$ 5.95 <sup>Ac</sup>   | 78.05 $\pm$ 5.73 <sup>ABc</sup>  | 82.55 $\pm$ 4.00 <sup>Ba</sup>   | 82.45 $\pm$ 3.70 <sup>Aab</sup>  |
|               | M     | 83.11 $\pm$ 9.81 <sup>Ab</sup>  | 81.52 $\pm$ 9.61 <sup>Ab</sup>  | 80.41 $\pm$ 7.89 <sup>Ab</sup>   | 81.41 $\pm$ 9.00 <sup>Ab</sup>   | 90.29 $\pm$ 9.06 <sup>Aa</sup>   | 87.58 $\pm$ 10.28 <sup>Aa</sup>  |
| Albumin (g/L) | P     | 32.50 $\pm$ 2.88 <sup>Aa</sup>  | 32.50 $\pm$ 3.27 <sup>Aa</sup>  | 32.61 $\pm$ 3.62 <sup>Aa</sup>   | 32.50 $\pm$ 4.35 <sup>Ba</sup>   | 34.38 $\pm$ 3.69 <sup>Ba</sup>   | 34.92 $\pm$ 5.90 <sup>Aa</sup>   |
|               | B     | 32.75 $\pm$ 2.33 <sup>Ab</sup>  | 34.40 $\pm$ 2.47 <sup>Aab</sup> | 34.90 $\pm$ 2.46 <sup>Aab</sup>  | 35.40 $\pm$ 6.18 <sup>Aab</sup>  | 37.35 $\pm$ 4.82 <sup>Aa</sup>   | 37.05 $\pm$ 4.47 <sup>Aa</sup>   |
|               | M     | 32.52 $\pm$ 3.57 <sup>Ab</sup>  | 32.70 $\pm$ 3.11 <sup>Ab</sup>  | 33.64 $\pm$ 3.40 <sup>Ab</sup>   | 32.82 $\pm$ 2.96 <sup>ABb</sup>  | 37.52 $\pm$ 6.65 <sup>Aa</sup>   | 34.76 $\pm$ 2.63 <sup>Aab</sup>  |
| AST (U/L)     | P     | 74.92 $\pm$ 24.97 <sup>Ab</sup> | 82.61 $\pm$ 48.03 <sup>Ab</sup> | 78.65 $\pm$ 19.96 <sup>Ab</sup>  | 103.57 $\pm$ 47.40 <sup>Aa</sup> | 77.30 $\pm$ 19.58 <sup>Ab</sup>  | 67.80 $\pm$ 12.90 <sup>Ab</sup>  |
|               | B     | 61.40 $\pm$ 11.02 <sup>Ab</sup> | 64.85 $\pm$ 15.93 <sup>Bb</sup> | 72.15 $\pm$ 11.78 <sup>Ab</sup>  | 93.20 $\pm$ 27.67 <sup>ABa</sup> | 71.35 $\pm$ 12.70 <sup>Ab</sup>  | 72.40 $\pm$ 14.31 <sup>Ab</sup>  |
|               | M     | 59.88 $\pm$ 10.88 <sup>Ab</sup> | 62.35 $\pm$ 7.66 <sup>Bb</sup>  | 69.76 $\pm$ 27.68 <sup>Aab</sup> | 85.23 $\pm$ 25.98 <sup>Ba</sup>  | 70.52 $\pm$ 20.41 <sup>Aab</sup> | 69.64 $\pm$ 14.46 <sup>Aab</sup> |
| GGT (U/L)     | P     | 27.50 $\pm$ 3.78 <sup>Ab</sup>  | 32.11 $\pm$ 4.36 <sup>Ab</sup>  | 49.53 $\pm$ 30.92 <sup>Aa</sup>  | 33.53 $\pm$ 9.19 <sup>Ab</sup>   | 30.26 $\pm$ 6.35 <sup>Ab</sup>   | 26.19 $\pm$ 4.82 <sup>Ab</sup>   |
|               | B     | 25.30 $\pm$ 5.66 <sup>Ab</sup>  | 31.10 $\pm$ 5.27 <sup>Aab</sup> | 37.65 $\pm$ 8.62 <sup>Ba</sup>   | 29.00 $\pm$ 5.80 <sup>Aab</sup>  | 29.50 $\pm$ 5.80 <sup>Aab</sup>  | 31.20 $\pm$ 8.87 <sup>Aab</sup>  |
|               | M     | 27.88 $\pm$ 6.31 <sup>Ab</sup>  | 32.00 $\pm$ 6.43 <sup>Aab</sup> | 42.11 $\pm$ 15.75 <sup>ABa</sup> | 37.23 $\pm$ 27.40 <sup>Aab</sup> | 38.41 $\pm$ 25.49 <sup>Aab</sup> | 33.47 $\pm$ 9.34 <sup>Aab</sup>  |

<sup>A,B</sup> different letters represent differences between groups ( $P < 0.05$ )

<sup>a,b,c</sup> different letters represent differences between moments ( $P < 0.05$ )

P: primiparous (n = 26); B: biparous (n = 21); M: multiparous (n = 17)
