# Supplementary material for: Effect of Parity, Body Condition Score at Calving, and Milk Yield on the Metabolic Profile of Gyr Cows in the Transition Period
Source: MDPI journal article supplement (doi:10.3390/ani13152509), 2023-08-03
Supplement: s1 [file s1]

Supplementary Table S4. Variation (mean  $\pm$  SD) of body condition score (BCS), serum concentrations of non-esterified fatty acids (NEFA), beta-hydroxybutyrate (BHB), and cholesterol, and plasma glucose concentrations in high-producing Gyr cows grouped according to BCS at calving, on different days relative to calving (0 d), throughout the transition period.

| Variable             | Group | -21 d                         | -7 d                           | 0 d                            | 7 d                            | 21 d                           | 42 d                            |
|----------------------|-------|-------------------------------|--------------------------------|--------------------------------|--------------------------------|--------------------------------|---------------------------------|
| BCS                  | HBCS  | 4.10 $\pm$ 0.30 <sup>Aa</sup> | 4.04 $\pm$ 0.24 <sup>Aa</sup>  | 4.04 $\pm$ 0.24 <sup>Aa</sup>  | 3.71 $\pm$ 0.28 <sup>Ab</sup>  | 3.51 $\pm$ 0.21 <sup>Ac</sup>  | 3.38 $\pm$ 0.35 <sup>Ac</sup>   |
|                      | NBCS  | 3.35 $\pm$ 0.12 <sup>Ba</sup> | 3.35 $\pm$ 0.16 <sup>Ba</sup>  | 3.35 $\pm$ 0.16 <sup>Ba</sup>  | 3.31 $\pm$ 0.15 <sup>Ba</sup>  | 3.22 $\pm$ 0.19 <sup>Ba</sup>  | 3.26 $\pm$ 0.20 <sup>Aa</sup>   |
| NEFA (mmol/L)        | HBCS  | 0.28 $\pm$ 0.18 <sup>Ab</sup> | 0.49 $\pm$ 0.43 <sup>Ab</sup>  | 0.90 $\pm$ 0.36 <sup>Aa</sup>  | 0.84 $\pm$ 0.61 <sup>Aab</sup> | 0.54 $\pm$ 0.32 <sup>Ab</sup>  | 1.09 $\pm$ 0.73 <sup>Aa</sup>   |
|                      | NBCS  | 0.36 $\pm$ 0.17 <sup>Ac</sup> | 0.49 $\pm$ 0.44 <sup>Abc</sup> | 0.91 $\pm$ 0.30 <sup>Aa</sup>  | 0.77 $\pm$ 0.47 <sup>Aab</sup> | 0.50 $\pm$ 0.33 <sup>Abc</sup> | 0.69 $\pm$ 0.49 <sup>Babc</sup> |
| BHB (mmol/L)         | HBCS  | 0.34 $\pm$ 0.12 <sup>Ab</sup> | 0.44 $\pm$ 0.10 <sup>Ab</sup>  | 0.47 $\pm$ 0.14 <sup>Ab</sup>  | 0.69 $\pm$ 0.25 <sup>Aab</sup> | 0.55 $\pm$ 0.22 <sup>Ab</sup>  | 0.86 $\pm$ 0.57 <sup>Aa</sup>   |
|                      | NBCS  | 0.36 $\pm$ 0.13 <sup>Ab</sup> | 0.44 $\pm$ 0.14 <sup>Ab</sup>  | 0.50 $\pm$ 0.10 <sup>Aab</sup> | 0.68 $\pm$ 0.24 <sup>Aa</sup>  | 0.46 $\pm$ 0.20 <sup>Aab</sup> | 0.66 $\pm$ 0.52 <sup>Bab</sup>  |
| Glucose (mmol/L)     | HBCS  | 3.09 $\pm$ 0.45 <sup>Ab</sup> | 2.96 $\pm$ 0.53 <sup>Ab</sup>  | 6.74 $\pm$ 3.46 <sup>Aa</sup>  | 3.24 $\pm$ 0.65 <sup>Ab</sup>  | 3.38 $\pm$ 0.79 <sup>Ab</sup>  | 3.09 $\pm$ 0.78 <sup>Ab</sup>   |
|                      | NBCS  | 3.08 $\pm$ 0.47 <sup>Ab</sup> | 3.04 $\pm$ 0.49 <sup>Ab</sup>  | 6.30 $\pm$ 3.38 <sup>Aa</sup>  | 3.52 $\pm$ 0.71 <sup>Ab</sup>  | 3.54 $\pm$ 0.85 <sup>Ab</sup>  | 3.12 $\pm$ 0.85 <sup>Ab</sup>   |
| Cholesterol (mmol/L) | HBCS  | 2.67 $\pm$ 0.44 <sup>Ac</sup> | 2.61 $\pm$ 0.51 <sup>Ac</sup>  | 2.46 $\pm$ 0.42 <sup>Ac</sup>  | 2.94 $\pm$ 0.73 <sup>Ac</sup>  | 4.77 $\pm$ 1.15 <sup>Ab</sup>  | 6.69 $\pm$ 1.43 <sup>Aa</sup>   |
|                      | NBCS  | 2.55 $\pm$ 0.47 <sup>Ac</sup> | 2.54 $\pm$ 0.55 <sup>Ac</sup>  | 2.34 $\pm$ 0.42 <sup>Ac</sup>  | 2.86 $\pm$ 0.42 <sup>Ac</sup>  | 4.65 $\pm$ 1.20 <sup>Ab</sup>  | 6.38 $\pm$ 1.49 <sup>Aa</sup>   |

<sup>A,B</sup> different letters represent differences between groups ( $P < 0.05$ ).

<sup>a,b,c</sup> different letters represent differences between moments ( $P < 0.05$ ).

HBCS: high body condition score ( $>3.5$ ;  $n = 21$ ); NBCS: normal body condition score ( $3.0-3.5$ ;  $n = 20$ )
