# Supplementary material for: Effect of Parity, Body Condition Score at Calving, and Milk Yield on the Metabolic Profile of Gyr Cows in the Transition Period
Source: MDPI journal article supplement (doi:10.3390/ani13152509), 2023-08-03
Supplement: s1 [file s1]

Supplementary Table S6. Variation (mean  $\pm$  SD) of serum concentrations of total calcium (Ca), phosphorus (P), and magnesium (Mg) in high-producing Gyr cows grouped according to BCS at calving, on different days relative to calving (0 d) throughout the transition period.

| Variable    | Group | -21 d                          | -7 d                           | 0 d                           | 7 d                            | 21 d                           | 42 d                           |
|-------------|-------|--------------------------------|--------------------------------|-------------------------------|--------------------------------|--------------------------------|--------------------------------|
| Ca (mmol/L) | HBCS  | 2.23 $\pm$ 0.11 <sup>Aa</sup>  | 2.25 $\pm$ 0.10 <sup>Aa</sup>  | 2.17 $\pm$ 0.14 <sup>Aa</sup> | 2.23 $\pm$ 0.13 <sup>Aa</sup>  | 2.27 $\pm$ 0.11 <sup>Aa</sup>  | 2.25 $\pm$ 0.19 <sup>Aa</sup>  |
|             | NBCS  | 2.18 $\pm$ 0.13 <sup>Aab</sup> | 2.23 $\pm$ 0.08 <sup>Aab</sup> | 2.12 $\pm$ 0.14 <sup>Ab</sup> | 2.21 $\pm$ 0.14 <sup>Aab</sup> | 2.26 $\pm$ 0.13 <sup>Aa</sup>  | 2.27 $\pm$ 0.17 <sup>Aa</sup>  |
| P (mmol/L)  | HBCS  | 2.24 $\pm$ 0.24 <sup>Aa</sup>  | 2.29 $\pm$ 0.30 <sup>Aa</sup>  | 1.74 $\pm$ 0.49 <sup>Ab</sup> | 2.04 $\pm$ 0.38 <sup>Aab</sup> | 2.16 $\pm$ 0.28 <sup>Aa</sup>  | 2.08 $\pm$ 0.24 <sup>Aa</sup>  |
|             | NBCS  | 2.23 $\pm$ 0.30 <sup>Aa</sup>  | 2.32 $\pm$ 0.28 <sup>Aa</sup>  | 1.73 $\pm$ 0.53 <sup>Ab</sup> | 2.02 $\pm$ 0.44 <sup>Aab</sup> | 2.17 $\pm$ 0.29 <sup>Aa</sup>  | 2.18 $\pm$ 0.30 <sup>Aa</sup>  |
| Mg (mmol/L) | HBCS  | 1.07 $\pm$ 0.11 <sup>Aa</sup>  | 1.01 $\pm$ 0.15 <sup>Aab</sup> | 0.98 $\pm$ 0.14 <sup>Ab</sup> | 0.95 $\pm$ 0.11 <sup>Ab</sup>  | 1.03 $\pm$ 0.11 <sup>Aab</sup> | 1.02 $\pm$ 0.12 <sup>Aab</sup> |
|             | NBCS  | 1.06 $\pm$ 0.10 <sup>Aa</sup>  | 1.01 $\pm$ 0.09 <sup>Aab</sup> | 0.96 $\pm$ 0.12 <sup>Ab</sup> | 0.93 $\pm$ 0.10 <sup>Ab</sup>  | 1.02 $\pm$ 0.09 <sup>Aab</sup> | 1.00 $\pm$ 0.12 <sup>Aab</sup> |

<sup>A,B</sup> different letters represent differences between groups ( $P < 0.05$ ).

<sup>a,b,c</sup> different letters represent differences between moments ( $P < 0.05$ ).

HBCS: high body condition score ( $>3.5$ ;  $n = 21$ ); NBCS: normal body condition score ( $3.0$ - $3.5$ ;  $n = 20$ )
