# Supplementary material for: Effect of Parity, Body Condition Score at Calving, and Milk Yield on the Metabolic Profile of Gyr Cows in the Transition Period
Source: MDPI journal article supplement (doi:10.3390/ani13152509), 2023-08-03
Supplement: s1 [file s1]

Supplementary Table S7. Variation (mean  $\pm$  SD) of body condition score (BCS) and serum concentrations of non-esterified fatty acids (NEFA), beta-hydroxybutyrate (BHB), and cholesterol, and plasma glucose concentrations in Gyr cows grouped according to milk yield on different days relative to calving (0 d) throughout the transition period.

| Variable             | Group | -21 d                         | -7 d                           | 0 d                            | 7 d                            | 21 d                           | 42 d                           |
|----------------------|-------|-------------------------------|--------------------------------|--------------------------------|--------------------------------|--------------------------------|--------------------------------|
| BCS                  | HP    | 3.67 $\pm$ 0.43 <sup>Aa</sup> | 3.64 $\pm$ 0.35 <sup>Aa</sup>  | 3.64 $\pm$ 0.35 <sup>Aa</sup>  | 3.51 $\pm$ 0.30 <sup>Aa</sup>  | 3.28 $\pm$ 0.28 <sup>Ab</sup>  | 3.29 $\pm$ 0.25 <sup>Ab</sup>  |
|                      | MP    | 3.63 $\pm$ 0.43 <sup>Aa</sup> | 3.64 $\pm$ 0.41 <sup>Aa</sup>  | 3.59 $\pm$ 0.51 <sup>Aa</sup>  | 3.45 $\pm$ 0.28 <sup>Ab</sup>  | 3.37 $\pm$ 0.25 <sup>Abc</sup> | 3.26 $\pm$ 0.31 <sup>Ac</sup>  |
| NEFA (mmol/L)        | HP    | 0.28 $\pm$ 0.17 <sup>Ac</sup> | 0.36 $\pm$ 0.28 <sup>Abc</sup> | 0.92 $\pm$ 0.32 <sup>Aab</sup> | 0.98 $\pm$ 0.64 <sup>Aab</sup> | 0.65 $\pm$ 0.36 <sup>Ab</sup>  | 1.03 $\pm$ 0.64 <sup>Aa</sup>  |
|                      | MP    | 0.31 $\pm$ 0.18 <sup>Ac</sup> | 0.50 $\pm$ 0.47 <sup>Ac</sup>  | 0.87 $\pm$ 0.34 <sup>Aa</sup>  | 0.81 $\pm$ 0.56 <sup>Aab</sup> | 0.52 $\pm$ 0.33 <sup>Abc</sup> | 0.75 $\pm$ 0.56 <sup>Bab</sup> |
| BHB (mmol/L)         | HP    | 0.39 $\pm$ 0.11 <sup>Ac</sup> | 0.39 $\pm$ 0.09 <sup>Ac</sup>  | 0.49 $\pm$ 0.14 <sup>Abc</sup> | 0.77 $\pm$ 0.23 <sup>Aab</sup> | 0.63 $\pm$ 0.23 <sup>Ab</sup>  | 0.94 $\pm$ 0.66 <sup>Aa</sup>  |
|                      | MP    | 0.35 $\pm$ 0.11 <sup>Ab</sup> | 0.48 $\pm$ 0.12 <sup>Aab</sup> | 0.46 $\pm$ 0.14 <sup>Aab</sup> | 0.64 $\pm$ 0.25 <sup>Aa</sup>  | 0.50 $\pm$ 0.31 <sup>Aab</sup> | 0.64 $\pm$ 0.36 <sup>Ba</sup>  |
| Glucose (mmol/L)     | HP    | 3.12 $\pm$ 0.55 <sup>Ab</sup> | 2.95 $\pm$ 0.64 <sup>Ab</sup>  | 7.05 $\pm$ 3.50 <sup>Aa</sup>  | 3.02 $\pm$ 0.43 <sup>Ab</sup>  | 3.11 $\pm$ 0.74 <sup>Ab</sup>  | 2.77 $\pm$ 0.59 <sup>Ab</sup>  |
|                      | MP    | 3.00 $\pm$ 0.54 <sup>Ab</sup> | 2.98 $\pm$ 0.48 <sup>Ab</sup>  | 6.09 $\pm$ 2.89 <sup>Ba</sup>  | 3.58 $\pm$ 0.80 <sup>Ab</sup>  | 3.67 $\pm$ 0.79 <sup>Ab</sup>  | 3.42 $\pm$ 0.89 <sup>Ab</sup>  |
| Cholesterol (mmol/L) | HP    | 2.73 $\pm$ 0.48 <sup>Ad</sup> | 2.60 $\pm$ 0.42 <sup>Ad</sup>  | 2.54 $\pm$ 0.40 <sup>Ad</sup>  | 3.24 $\pm$ 0.56 <sup>Ac</sup>  | 5.16 $\pm$ 0.98 <sup>Ab</sup>  | 6.76 $\pm$ 1.54 <sup>Aa</sup>  |
|                      | MP    | 2.55 $\pm$ 0.40 <sup>Ac</sup> | 2.57 $\pm$ 0.56 <sup>Ad</sup>  | 2.40 $\pm$ 0.40 <sup>Ad</sup>  | 2.84 $\pm$ 0.86 <sup>Ac</sup>  | 4.61 $\pm$ 0.90 <sup>Bb</sup>  | 5.80 $\pm$ 1.24 <sup>Ba</sup>  |

<sup>A,B</sup> different letters represent differences between groups ( $P < 0.05$ ).

<sup>a,b,c</sup> different letters represent differences between moments ( $P < 0.05$ ).

HP: high production ( $>30$  kg/day;  $n = 22$ ); MP: moderate production (20-30 kg/day;  $n = 30$ )
