# Supplementary material for: Effect of Parity, Body Condition Score at Calving, and Milk Yield on the Metabolic Profile of Gyr Cows in the Transition Period
Source: MDPI journal article supplement (doi:10.3390/ani13152509), 2023-08-03
Supplement: s1 [file s1]

Supplementary Table S3. Variation (mean  $\pm$  SD) of serum concentrations of total calcium (Ca), phosphorus (P), and magnesium (Mg) in high-producing Gyr cows grouped according to parity, on different days relative to calving (0 d), throughout the transition period.

| Variable    | Group | -21 d                          | -7 d                           | 0 d                            | 7 d                            | 21 d                           | 42 d                           |
|-------------|-------|--------------------------------|--------------------------------|--------------------------------|--------------------------------|--------------------------------|--------------------------------|
| Ca (mmol/L) | P     | 2.20 $\pm$ 0.08 <sup>Aab</sup> | 2.25 $\pm$ 0.06 <sup>Aab</sup> | 2.22 $\pm$ 0.18 <sup>Aab</sup> | 2.25 $\pm$ 0.17 <sup>Aab</sup> | 2.27 $\pm$ 0.12 <sup>ABa</sup> | 2.17 $\pm$ 0.17 <sup>Bb</sup>  |
|             | B     | 2.46 $\pm$ 0.23 <sup>Ab</sup>  | 2.29 $\pm$ 0.24 <sup>Aab</sup> | 2.20 $\pm$ 0.49 <sup>ABb</sup> | 2.37 $\pm$ 0.45 <sup>Aab</sup> | 2.50 $\pm$ 0.37 <sup>Aa</sup>  | 2.27 $\pm$ 0.28 <sup>Aab</sup> |
|             | M     | 2.16 $\pm$ 0.11 <sup>Aab</sup> | 2.23 $\pm$ 0.09 <sup>Aab</sup> | 2.11 $\pm$ 0.15 <sup>Bb</sup>  | 2.20 $\pm$ 0.13 <sup>Aab</sup> | 2.22 $\pm$ 0.11 <sup>Bab</sup> | 2.24 $\pm$ 0.16 <sup>ABa</sup> |
| P (mmol/L)  | P     | 2.46 $\pm$ 0.23 <sup>Aa</sup>  | 2.29 $\pm$ 0.24 <sup>Aa</sup>  | 1.81 $\pm$ 0.49 <sup>Ab</sup>  | 2.37 $\pm$ 0.45 <sup>Aa</sup>  | 2.50 $\pm$ 0.37 <sup>Aa</sup>  | 2.27 $\pm$ 0.28 <sup>Aa</sup>  |
|             | B     | 2.26 $\pm$ 0.25 <sup>Aa</sup>  | 2.23 $\pm$ 0.19 <sup>Aa</sup>  | 1.86 $\pm$ 0.50 <sup>Ab</sup>  | 1.98 $\pm$ 0.27 <sup>Bab</sup> | 2.19 $\pm$ 0.22 <sup>Ba</sup>  | 2.15 $\pm$ 0.22 <sup>Aa</sup>  |
|             | M     | 2.24 $\pm$ 0.31 <sup>Aa</sup>  | 2.35 $\pm$ 0.30 <sup>Aa</sup>  | 1.67 $\pm$ 0.52 <sup>Ab</sup>  | 2.07 $\pm$ 0.46 <sup>Ba</sup>  | 2.13 $\pm$ 0.29 <sup>Ba</sup>  | 2.16 $\pm$ 0.31 <sup>Aa</sup>  |
| Mg (mmol/L) | P     | 1.24 $\pm$ 0.16 <sup>Aa</sup>  | 1.07 $\pm$ 0.14 <sup>Aa</sup>  | 1.00 $\pm$ 0.13 <sup>Aa</sup>  | 1.00 $\pm$ 0.14 <sup>Aa</sup>  | 1.05 $\pm$ 0.18 <sup>Aa</sup>  | 1.04 $\pm$ 0.28 <sup>Aa</sup>  |
|             | B     | 1.12 $\pm$ 0.09 <sup>Aa</sup>  | 1.04 $\pm$ 0.12 <sup>Aab</sup> | 0.91 $\pm$ 0.10 <sup>Ab</sup>  | 0.97 $\pm$ 0.10 <sup>Ab</sup>  | 1.08 $\pm$ 0.10 <sup>Aab</sup> | 1.06 $\pm$ 0.08 <sup>Aab</sup> |
|             | M     | 1.04 $\pm$ 0.09 <sup>Aa</sup>  | 1.00 $\pm$ 0.09 <sup>Aab</sup> | 0.97 $\pm$ 0.13 <sup>Aab</sup> | 0.91 $\pm$ 0.10 <sup>Ab</sup>  | 1.01 $\pm$ 0.09 <sup>Aab</sup> | 0.98 $\pm$ 0.12 <sup>Aab</sup> |

<sup>A,B</sup> different letters represent differences between groups (P < 0.05)

<sup>a,b,c</sup> different letters represent differences between moments (P < 0.05)

P: primiparous (n = 26); B: biparous (n = 21); M: multiparous (n = 17)
