# Supplementary material for: Effect of Parity, Body Condition Score at Calving, and Milk Yield on the Metabolic Profile of Gyr Cows in the Transition Period
Source: MDPI journal article supplement (doi:10.3390/ani13152509), 2023-08-03
Supplement: s1 [file s1]

Supplementary Table S1. Variation (mean  $\pm$  SD) of body condition score (BCS), serum concentrations of non-esterified fatty acids (NEFA), beta-hydroxybutyrate (BHB), and cholesterol, and plasma glucose concentrations in high-producing Gyr cows grouped according to parity, on different days relative to calving (0 d), throughout the transition period.

| Variable             | Group | -21 d                           | -7 d                            | 0 d                            | 7 d                            | 21 d                           | 42 d                           |
|----------------------|-------|---------------------------------|---------------------------------|--------------------------------|--------------------------------|--------------------------------|--------------------------------|
| BCS                  | P     | 3.30 $\pm$ 0.19 <sup>Aa</sup>   | 3.29 $\pm$ 0.20 <sup>Aa</sup>   | 3.29 $\pm$ 0.20 <sup>Aab</sup> | 3.17 $\pm$ 0.25 <sup>Bb</sup>  | 3.10 $\pm$ 0.27 <sup>Abc</sup> | 3.02 $\pm$ 0.46 <sup>Bc</sup>  |
|                      | B     | 3.38 $\pm$ 0.15 <sup>Aab</sup>  | 3.42 $\pm$ 0.14 <sup>Aa</sup>   | 3.42 $\pm$ 0.14 <sup>Aa</sup>  | 3.35 $\pm$ 0.17 <sup>Aab</sup> | 3.25 $\pm$ 0.16 <sup>Ab</sup>  | 3.20 $\pm$ 0.19 <sup>Ab</sup>  |
|                      | M     | 3.35 $\pm$ 0.12 <sup>Aa</sup>   | 3.35 $\pm$ 0.17 <sup>Aa</sup>   | 3.35 $\pm$ 0.17 <sup>Aa</sup>  | 3.30 $\pm$ 0.16 <sup>ABa</sup> | 3.22 $\pm$ 0.21 <sup>Aa</sup>  | 3.25 $\pm$ 0.21 <sup>Aa</sup>  |
| NEFA (mmol/L)        | P     | 0.26 $\pm$ 0.04 <sup>Ab</sup>   | 0.30 $\pm$ 0.14 <sup>Ab</sup>   | 0.79 $\pm$ 0.35 <sup>Aa</sup>  | 0.72 $\pm$ 0.46 <sup>Aab</sup> | 0.50 $\pm$ 0.40 <sup>Ab</sup>  | 0.54 $\pm$ 0.31 <sup>Aab</sup> |
|                      | B     | 0.23 $\pm$ 0.13 <sup>Ac</sup>   | 0.29 $\pm$ 0.22 <sup>Ac</sup>   | 0.80 $\pm$ 0.33 <sup>Aab</sup> | 0.96 $\pm$ 0.66 <sup>Aa</sup>  | 0.55 $\pm$ 0.39 <sup>Abc</sup> | 0.63 $\pm$ 0.51 <sup>Ab</sup>  |
|                      | M     | 0.38 $\pm$ 0.18 <sup>Ab</sup>   | 0.52 $\pm$ 0.46 <sup>Ab</sup>   | 0.90 $\pm$ 0.30 <sup>Aa</sup>  | 0.69 $\pm$ 0.46 <sup>Aab</sup> | 0.52 $\pm$ 0.54 <sup>Ab</sup>  | 0.74 $\pm$ 0.51 <sup>Aab</sup> |
| BHB (mmol/L)         | P     | 0.47 $\pm$ 0.10 <sup>Ab</sup>   | 0.48 $\pm$ 0.11 <sup>Ab</sup>   | 0.43 $\pm$ 0.19 <sup>Ab</sup>  | 0.68 $\pm$ 0.24 <sup>Aa</sup>  | 0.57 $\pm$ 0.29 <sup>Aab</sup> | 0.44 $\pm$ 0.12 <sup>Bb</sup>  |
|                      | B     | 0.36 $\pm$ 0.09 <sup>Ab</sup>   | 0.45 $\pm$ 0.10 <sup>Ab</sup>   | 0.44 $\pm$ 0.18 <sup>Ab</sup>  | 0.69 $\pm$ 0.27 <sup>Aa</sup>  | 0.60 $\pm$ 0.33 <sup>Aab</sup> | 0.62 $\pm$ 0.36 <sup>Aab</sup> |
|                      | M     | 0.36 $\pm$ 0.13 <sup>Ab</sup>   | 0.43 $\pm$ 0.15 <sup>Ab</sup>   | 0.48 $\pm$ 0.10 <sup>Ab</sup>  | 0.64 $\pm$ 0.23 <sup>Aab</sup> | 0.46 $\pm$ 0.22 <sup>Ab</sup>  | 0.69 $\pm$ 0.56 <sup>Aa</sup>  |
| Glucose (mmol/L)     | P     | 2.14 $\pm$ 1.15 <sup>Ab</sup>   | 3.06 $\pm$ 0.63 <sup>Ab</sup>   | 6.64 $\pm$ 2.17 <sup>Aa</sup>  | 3.43 $\pm$ 0.74 <sup>Ab</sup>  | 3.55 $\pm$ 0.60 <sup>Ab</sup>  | 3.47 $\pm$ 0.67 <sup>Ab</sup>  |
|                      | B     | 2.99 $\pm$ 0.64 <sup>Ab</sup>   | 2.98 $\pm$ 0.63 <sup>Ab</sup>   | 6.13 $\pm$ 2.98 <sup>Aa</sup>  | 3.26 $\pm$ 0.81 <sup>Ab</sup>  | 3.29 $\pm$ 0.65 <sup>Ab</sup>  | 3.29 $\pm$ 0.68 <sup>Ab</sup>  |
|                      | M     | 3.05 $\pm$ 0.45 <sup>Ab</sup>   | 2.98 $\pm$ 0.37 <sup>Ab</sup>   | 6.12 $\pm$ 3.04 <sup>Aa</sup>  | 3.52 $\pm$ 0.75 <sup>Ab</sup>  | 3.58 $\pm$ 0.92 <sup>Ab</sup>  | 3.10 $\pm$ 0.92 <sup>Ab</sup>  |
| Cholesterol (mmol/L) | P     | 2.54 $\pm$ 1.10 <sup>Accd</sup> | 2.55 $\pm$ 0.47 <sup>Accd</sup> | 2.32 $\pm$ 0.41 <sup>Ad</sup>  | 2.87 $\pm$ 0.68 <sup>Ac</sup>  | 4.03 $\pm$ 0.79 <sup>Bb</sup>  | 5.77 $\pm$ 1.32 <sup>ABa</sup> |
|                      | B     | 2.71 $\pm$ 0.44 <sup>Ab</sup>   | 2.75 $\pm$ 0.49 <sup>Ab</sup>   | 2.59 $\pm$ 0.46 <sup>Ab</sup>  | 3.19 $\pm$ 0.70 <sup>Ab</sup>  | 4.94 $\pm$ 0.76 <sup>Aa</sup>  | 5.31 $\pm$ 1.19 <sup>Ba</sup>  |
|                      | M     | 2.46 $\pm$ 0.41 <sup>Ac</sup>   | 2.43 $\pm$ 0.49 <sup>Ac</sup>   | 2.24 $\pm$ 0.32 <sup>Ac</sup>  | 2.74 $\pm$ 0.66 <sup>Ac</sup>  | 4.40 $\pm$ 1.13 <sup>ABb</sup> | 6.31 $\pm$ 1.56 <sup>Aa</sup>  |

<sup>A,B</sup> different letters represent differences between groups ( $P < 0.05$ )

<sup>a,b,c</sup> different letters represent differences between moments ( $P < 0.05$ )

P: primiparous (n = 26); B: biparous (n = 21); M: multiparous (n = 17)
