# Supplementary material for: Effect of Parity, Body Condition Score at Calving, and Milk Yield on the Metabolic Profile of Gyr Cows in the Transition Period
Source: MDPI journal article supplement (doi:10.3390/ani13152509), 2023-08-03
Supplement: s1 [file s1]

Supplementary Table S5. Variation (mean  $\pm$  SD) of serum concentrations of total proteins (PT) and albumin, and serum aspartate aminotransferase (AST) and gamma-glutamyltransferase (GGT) activities in high-producing Gyr cows grouped according to BCS at calving, on different days relative to calving (0 d) throughout the transition period.

| Variable      | Group | -21 d                           | -7 d                            | 0 d                              | 7 d                              | 21 d                             | 42 d                             |
|---------------|-------|---------------------------------|---------------------------------|----------------------------------|----------------------------------|----------------------------------|----------------------------------|
| TP (g/L)      | HBCS  | 79.61 $\pm$ 7.67 <sup>Ab</sup>  | 78.47 $\pm$ 7.22 <sup>Ab</sup>  | 77.47 $\pm$ 4.95 <sup>Ab</sup>   | 79.23 $\pm$ 4.67 <sup>Ab</sup>   | 86.19 $\pm$ 6.97 <sup>Aa</sup>   | 81.66 $\pm$ 11.24 <sup>Aab</sup> |
|               | NBCS  | 82.10 $\pm$ 9.53 <sup>Ab</sup>  | 80.10 $\pm$ 9.75 <sup>Ab</sup>  | 79.10 $\pm$ 8.18 <sup>Ab</sup>   | 80.40 $\pm$ 8.62 <sup>Ab</sup>   | 88.60 $\pm$ 9.30 <sup>Aa</sup>   | 86.50 $\pm$ 9.83 <sup>Aa</sup>   |
| Albumin (g/L) | HBCS  | 32.28 $\pm$ 2.72 <sup>Ab</sup>  | 33.33 $\pm$ 2.70 <sup>Ab</sup>  | 34.85 $\pm$ 2.63 <sup>Aab</sup>  | 35.00 $\pm$ 6.06 <sup>Aab</sup>  | 37.04 $\pm$ 6.41 <sup>Aa</sup>   | 35.47 $\pm$ 5.81 <sup>Aab</sup>  |
|               | NBCS  | 32.55 $\pm$ 3.30 <sup>Ab</sup>  | 32.95 $\pm$ 2.96 <sup>Ab</sup>  | 33.90 $\pm$ 3.29 <sup>Aab</sup>  | 33.30 $\pm$ 2.97 <sup>Ab</sup>   | 37.30 $\pm$ 6.13 <sup>Aa</sup>   | 35.00 $\pm$ 2.53 <sup>Aab</sup>  |
| AST (U/L)     | HBCS  | 62.71 $\pm$ 11.24 <sup>Ab</sup> | 74.57 $\pm$ 32.53 <sup>Ab</sup> | 77.57 $\pm$ 21.83 <sup>Ab</sup>  | 96.00 $\pm$ 31.03 <sup>Aa</sup>  | 73.71 $\pm$ 18.30 <sup>Ab</sup>  | 74.85 $\pm$ 18.64 <sup>Ab</sup>  |
|               | NBCS  | 60.10 $\pm$ 11.77 <sup>Ab</sup> | 61.40 $\pm$ 7.74 <sup>Ab</sup>  | 69.65 $\pm$ 25.51 <sup>Aab</sup> | 83.50 $\pm$ 24.34 <sup>Aa</sup>  | 68.20 $\pm$ 19.63 <sup>Aab</sup> | 68.50 $\pm$ 14.58 <sup>Aab</sup> |
| GGT (U/L)     | HBCS  | 26.23 $\pm$ 5.10 <sup>Ac</sup>  | 33.38 $\pm$ 5.21 <sup>Abc</sup> | 42.76 $\pm$ 22.06 <sup>Aa</sup>  | 34.95 $\pm$ 24.60 <sup>Abc</sup> | 36.71 $\pm$ 23.00 <sup>Abc</sup> | 40.38 $\pm$ 16.81 <sup>Ab</sup>  |
|               | NBCS  | 26.75 $\pm$ 6.49 <sup>Ab</sup>  | 31.60 $\pm$ 6.21 <sup>Aab</sup> | 41.10 $\pm$ 14.81 <sup>Aa</sup>  | 35.50 $\pm$ 25.52 <sup>Aab</sup> | 36.60 $\pm$ 23.81 <sup>Aab</sup> | 32.65 $\pm$ 8.93 <sup>Aab</sup>  |

<sup>A,B</sup> different letters represent differences between groups ( $P < 0.05$ ).

<sup>a,b,c</sup> different letters represent differences between moments ( $P < 0.05$ ).

HBCS: high body condition score ( $>3.5$ ;  $n = 21$ ); NBCS: normal body condition score ( $3.0$ - $3.5$ ;  $n = 20$ )
