# Supplementary material for: Effect of Parity, Body Condition Score at Calving, and Milk Yield on the Metabolic Profile of Gyr Cows in the Transition Period
Source: MDPI journal article supplement (doi:10.3390/ani13152509), 2023-08-03
Supplement: s1 [file s1]

Supplementary Table S9. Variation (mean  $\pm$  SD) of serum concentrations of total calcium (Ca), phosphorus (P), and magnesium (Mg) in Gyr cows grouped according to milk yield on different days relative to calving (0 d) throughout of the transition period.

| Variable    | Group | -21 d                          | -7 d                           | 0 d                           | 7 d                            | 21 d                           | 42 d                            |
|-------------|-------|--------------------------------|--------------------------------|-------------------------------|--------------------------------|--------------------------------|---------------------------------|
| Ca (mmol/L) | HP    | 2.23 $\pm$ 0.09 <sup>Aab</sup> | 2.29 $\pm$ 0.09 <sup>Aa</sup>  | 2.15 $\pm$ 0.14 <sup>Ab</sup> | 2.22 $\pm$ 0.15 <sup>Aab</sup> | 2.30 $\pm$ 0.10 <sup>Aa</sup>  | 2.31 $\pm$ 0.11 <sup>Aa</sup>   |
|             | MP    | 2.19 $\pm$ 0.12 <sup>Aab</sup> | 2.22 $\pm$ 0.09 <sup>Aab</sup> | 2.17 $\pm$ 0.13 <sup>Ab</sup> | 2.23 $\pm$ 0.12 <sup>Aab</sup> | 2.27 $\pm$ 0.13 <sup>Aa</sup>  | 2.26 $\pm$ 0.16 <sup>Aa</sup>   |
| P (mmol/L)  | HP    | 2.32 $\pm$ 0.24 <sup>Aa</sup>  | 2.33 $\pm$ 0.20 <sup>Aa</sup>  | 1.55 $\pm$ 0.44 <sup>Bd</sup> | 1.87 $\pm$ 0.28 <sup>Bc</sup>  | 2.04 $\pm$ 0.24 <sup>Bbc</sup> | 2.15 $\pm$ 0.21 <sup>Aab</sup>  |
|             | MP    | 2.21 $\pm$ 0.27 <sup>Aa</sup>  | 2.26 $\pm$ 0.32 <sup>Aa</sup>  | 1.97 $\pm$ 0.50 <sup>Ab</sup> | 2.08 $\pm$ 0.39 <sup>Aab</sup> | 2.23 $\pm$ 0.24 <sup>Aa</sup>  | 2.15 $\pm$ 0.21 <sup>Aab</sup>  |
| Mg (mmol/L) | HP    | 1.09 $\pm$ 0.08 <sup>Aa</sup>  | 1.05 $\pm$ 0.11 <sup>Aab</sup> | 1.01 $\pm$ 0.12 <sup>Ab</sup> | 0.98 $\pm$ 0.09 <sup>Ab</sup>  | 1.06 $\pm$ 0.08 <sup>Aab</sup> | 1.06 $\pm$ 0.010 <sup>Aab</sup> |
|             | MP    | 1.08 $\pm$ 0.12 <sup>Aa</sup>  | 1.01 $\pm$ 0.12 <sup>Ab</sup>  | 0.91 $\pm$ 0.11 <sup>Bc</sup> | 0.93 $\pm$ 0.11 <sup>Ac</sup>  | 1.04 $\pm$ 0.09 <sup>Aab</sup> | 1.02 $\pm$ 0.10 <sup>Aab</sup>  |

<sup>A,B</sup> different letters represent differences between groups ( $P < 0.05$ ).

<sup>a,b,c</sup> different letters represent differences between moments ( $P < 0.05$ ).

HP: high production ( $>30$  kg/day;  $n = 22$ ); MP: moderate production (20-30 kg/day;  $n = 30$ )
