# Supplementary material for: Effect of Parity, Body Condition Score at Calving, and Milk Yield on the Metabolic Profile of Gyr Cows in the Transition Period
Source: MDPI journal article supplement (doi:10.3390/ani13152509), 2023-08-03
Supplement: s1 [file s1]

Supplementary Table S8. Variation (mean  $\pm$  SD) of serum concentrations of total proteins (PT) and albumin, and serum aspartate aminotransferase (AST) and gamma-glutamyltransferase (GGT) activities in Gyr cows grouped according to milk yield on different days relative to calving (0 d) throughout the transition period.

| Variable      | Group | -21 d                            | -7 d                             | 0 d                              | 7 d                              | 21 d                             | 42 d                             |
|---------------|-------|----------------------------------|----------------------------------|----------------------------------|----------------------------------|----------------------------------|----------------------------------|
| TP (g/L)      | HP    | 81.36 $\pm$ 10.08 <sup>Abc</sup> | 79.81 $\pm$ 8.46 <sup>Ac</sup>   | 78.86 $\pm$ 7.35 <sup>Ac</sup>   | 80.09 $\pm$ 7.29 <sup>Ac</sup>   | 85.59 $\pm$ 8.33 <sup>Aab</sup>  | 86.77 $\pm$ 10.63 <sup>Aa</sup>  |
|               | MP    | 79.56 $\pm$ 5.89 <sup>Ab</sup>   | 78.73 $\pm$ 7.49 <sup>Ab</sup>   | 77.86 $\pm$ 5.87 <sup>Ab</sup>   | 78.53 $\pm$ 6.21 <sup>Ab</sup>   | 85.66 $\pm$ 6.28 <sup>Aa</sup>   | 81.50 $\pm$ 6.53 <sup>Bb</sup>   |
| Albumin (g/L) | HP    | 31.63 $\pm$ 2.87 <sup>Ad</sup>   | 33.04 $\pm$ 2.60 <sup>Ac</sup>   | 34.54 $\pm$ 3.08 <sup>Abcd</sup> | 35.22 $\pm$ 5.88 <sup>Abc</sup>  | 39.13 $\pm$ 8.01 <sup>Aa</sup>   | 37.18 $\pm$ 5.84 <sup>Aab</sup>  |
|               | MP    | 33.36 $\pm$ 2.67 <sup>Ab</sup>   | 33.90 $\pm$ 2.97 <sup>Ab</sup>   | 34.90 $\pm$ 2.39 <sup>Aab</sup>  | 34.76 $\pm$ 5.30 <sup>Aab</sup>  | 36.73 $\pm$ 3.24 <sup>Ba</sup>   | 35.33 $\pm$ 3.30 <sup>Aab</sup>  |
| AST (U/L)     | HP    | 60.36 $\pm$ 10.22 <sup>Ab</sup>  | 66.00 $\pm$ 19.96 <sup>Ab</sup>  | 65.68 $\pm$ 15.27 <sup>Ab</sup>  | 93.09 $\pm$ 27.50 <sup>Aa</sup>  | 68.31 $\pm$ 9.10 <sup>Ab</sup>   | 70.00 $\pm$ 11.35 <sup>Ab</sup>  |
|               | MP    | 61.90 $\pm$ 11.40 <sup>Ac</sup>  | 64.66 $\pm$ 13.78 <sup>Abc</sup> | 74.06 $\pm$ 18. <sup>30Ab</sup>  | 89.83 $\pm$ 28.87 <sup>Aa</sup>  | 73.20 $\pm$ 18.72 <sup>Ab</sup>  | 73.36 $\pm$ 17.57 <sup>Ab</sup>  |
| GGT (U/L)     | HP    | 27.22 $\pm$ 5.75 <sup>Ac</sup>   | 34.04 $\pm$ 6.69 <sup>Aabc</sup> | 41.81 $\pm$ 19.45 <sup>Aa</sup>  | 30.31 $\pm$ 5.47 <sup>Abc</sup>  | 32.90 $\pm$ 5.60 <sup>Aabc</sup> | 38.59 $\pm$ 15.93 <sup>Aab</sup> |
|               | MP    | 25.83 $\pm$ 6.06 <sup>Ab</sup>   | 30.50 $\pm$ 4.70 <sup>Ab</sup>   | 38.26 $\pm$ 12.47 <sup>Aa</sup>  | 32.03 $\pm$ 20.96 <sup>Aab</sup> | 32.63 $\pm$ 19.66 <sup>Aab</sup> | 33.36 $\pm$ 10.78 <sup>Aab</sup> |

<sup>A,B</sup> different letters represent differences between groups ( $P < 0.05$ ).

<sup>a,b,c</sup> different letters represent differences between moments ( $P < 0.05$ ).

HP: high production ( $>30$  kg/day;  $n = 22$ ); MP: moderate production (20-30 kg/day;  $n = 30$ )
